# Supplementary material
Source: publisher figshare collection journal article supplement (https://tandf.figshare.com/articles/dataset/_/6635411)
Supplement: Supplementary file 3 [file 2]

Archive with 3 entries (3 files):
- ijmf_a_1479849_sm8477.pdf
- ijmf_a_1479849_sm8476.pdf
- ijmf_a_1479849_sm7188.pdf
