# Supplementary material
Source: publisher figshare collection journal article supplement (https://tandf.figshare.com/articles/dataset/_/6635411)
Supplement: Supplementary file 3 [file 2 › ijmf_a_1479849_sm7188.pdf]

## Cuestionario Sobre La Actividad Física Durante El Embarazo

### Instrucciones:

**Por favor** lea atentamente las preguntas y marque la respuesta correcta con una X. Si necesita cambiar su respuesta, asegúrese de que borra la respuesta incorrecta completamente. Si quiere añadir algún comentario, por favor escríbalo al lado de la pregunta correspondiente.

Ejemplo: Durante este trimestre, cuando no está en el trabajo, cuánto tiempo pasa normalmente:

#### E1. Cuidando a alguna persona mayor

Si cuida de su madre durante más de 2 horas al día, su respuesta debería marcarse de la siguiente forma...

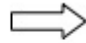

- ☐ Ninguno
- ☐ Menos de ½ hora al día
- ☐ De ½ a casi 1 hora al día
- ☐ De 1 a casi 2 horas al día
- ☒ De 2 a casi 3 horas al día
- ☐ 3 o más horas al día

Es muy importante que sea sincera. No hay una respuesta correcta o errónea. Simplemente queremos obtener información sobre las actividades que está haciendo este trimestre.

1. Fecha: \_\_\_\_ (Día) / \_\_\_\_ (Mes) / \_\_\_\_ (Año)
  2. ¿Cuál fue el primer día de su última menstruación? \_\_\_\_ (Día) / \_\_\_\_ (Mes) / \_\_\_\_ (Año) o No lo sé \_\_\_\_
  3. ¿Cuál es su fecha prevista de parto? \_\_\_\_ (Día) / \_\_\_\_ (Mes) / \_\_\_\_ (Año) o No lo sé \_\_\_\_
- 

**Durante este trimestre, cuando NO está en el trabajo, cuánto tiempo pasa normalmente:**

#### 4. Preparando comidas (cocinar, poner la mesa, lavar los platos)

- ☐ Ninguno
- ☐ Menos de ½ hora al día
- ☐ De ½ a casi 1 hora al día
- ☐ De 1 a casi 2 horas al día
- ☐ De 2 a casi 3 horas al día
- ☐ 3 o más horas al día

**5. Vistiendo, bañando, dando de comer a niños mientras está sentada**

- Ninguno
- Menos de ½ hora al día
- De ½ a casi 1 hora al día
- De 1 a casi 2 horas al día
- De 2 a casi 3 horas al día
- 3 o más horas al día

**Durante este trimestre, cuando NO está en el trabajo, cuánto tiempo pasa normalmente:**

**6. Vistiendo, bañando, dando de comer a niños mientras está de pie**

- Ninguno
- Menos de ½ hora al día
- De ½ a casi 1 hora al día
- De 1 a casi 2 horas al día
- De 2 a casi 3 horas al día
- 3 o más horas al día

**7. Jugando con niños mientras está sentada o de pie**

- Ninguno
- Menos de ½ hora al día
- De ½ a casi 1 hora al día
- De 1 a casi 2 horas al día
- De 2 a casi 3 horas al día
- 3 o más horas al día

**8. Jugando con niños mientras está andando o corriendo**

- Ninguno
- Menos de ½ hora al día
- De ½ a casi 1 hora al día
- De 1 a casi 2 horas al día
- De 2 a casi 3 horas al día
- 3 o más horas al día

**9. Llevando niños en brazos**

- Ninguno
- Menos de ½ hora al día
- De ½ a casi 1 hora al día
- De 1 a casi 2 horas al día
- De 2 a casi 3 horas al día
- 3 o más horas al día

**10. Cuidando a una persona mayor**

- ☐ Ninguno
- ☐ Menos de ½ hora al día
- ☐ De ½ a casi 1 hora al día
- ☐ De 1 a casi 2 horas al día
- ☐ De 2 a casi 3 horas al día
- ☐ 3 o más horas al día

**11. Sentada usando el ordenador o escribiendo, cuando no está en el trabajo**

- ☐ Ninguno
- ☐ Menos de ½ hora al día
- ☐ De ½ a casi 1 hora al día
- ☐ De 1 a casi 2 horas al día
- ☐ De 2 a casi 3 horas al día
- ☐ 3 o más horas al día

**12. Viendo la televisión o vídeos.**

- ☐ Ninguno
- ☐ Menos de ½ hora al día
- ☐ De ½ a casi 2 horas al día
- ☐ De 2 a casi 4 horas al día
- ☐ De 4 a casi 6 horas al día
- ☐ 6 o más horas al día

**13. Sentada leyendo, hablando o con el teléfono, cuando no está en el trabajo**

- ☐ Ninguno
- ☐ Menos de ½ hora al día
- ☐ De ½ a casi 2 horas al día
- ☐ De 2 a casi 4 horas al día
- ☐ De 4 a casi 6 horas al día
- ☐ 6 o más horas al día

**14. Jugando con mascotas**

- ☐ Ninguno
- ☐ Menos de ½ hora al día
- ☐ De ½ a casi 1 hora al día
- ☐ De 1 a casi 2 horas al día
- ☐ De 2 a casi 3 horas al día
- ☐ 3 o más horas al día

**15. Haciendo las tareas de la casa (hacer la cama, hacer la colada, planchando, ordenando)**

- ☐ Ninguno
- ☐ Menos de ½ hora al día
- ☐ De ½ a casi 1 hora al día
- ☐ De 1 a casi 2 horas al día
- ☐ De 2 a casi 3 horas al día
- ☐ 3 o más horas al día

**16. Comprando (comida, ropa u otros artículos)**

- ☐ Ninguno
- ☐ Menos de ½ hora al día
- ☐ De ½ a casi 1 hora al día
- ☐ De 1 a casi 2 horas al día
- ☐ De 2 a casi 3 horas al día
- ☐ 3 o más horas al día

**Durante este trimestre, cuando NO está en el trabajo, cuánto tiempo pasa normalmente:**

**17. Realizando una limpieza intensa (pasando la aspiradora, fregando, barriendo, limpiando las ventanas)**

- ☐ Ninguno
- ☐ Menos de ½ hora al día
- ☐ De ½ a casi 1 hora al día
- ☐ De 1 a casi 2 horas al día
- ☐ De 2 a casi 3 horas al día
- ☐ 3 o más horas al día

**18. Sentada mientras come, tanto en casa como en un bar/restaurante.**

- ☐ Ninguno
- ☐ Menos de ½ hora al día
- ☐ De ½ a casi 1 hora al día
- ☐ De 1 a casi 2 horas al día
- ☐ De 2 a casi 3 horas al día
- ☐ 3 o más horas al día

**19. Empujando un carrito de la compra y/o carrito de bebe o silla de ruedas**

- ☐ Ninguno
- ☐ Menos de ½ hora al día
- ☐ De ½ a casi 1 hora al día
- ☐ De 1 a casi 2 horas al día
- ☐ De 2 a casi 3 horas al día
- ☐ 3 o más horas al día

---

**Yendo a lugares...**

**Durante este trimestre, cuánto tiempo pasa normalmente:**

**20. Caminando lentamente para ir a sitios (como a la parada de autobús, al trabajo, de visita). No por placer ni para hacer ejercicio físico**

- ☐ Ninguno
- ☐ Menos de ½ hora al día
- ☐ De ½ a casi 1 hora al día
- ☐ De 1 a casi 2 horas al día
- ☐ De 2 a casi 3 horas al día
- ☐ 3 o más horas al día

**21. Caminando deprisa para ir a sitios (como a la parada de autobús, al trabajo, de visita). No por placer ni para hacer ejercicio físico**

- ☐ Ninguno
- ☐ Menos de ½ hora al día
- ☐ De ½ a casi 1 hora al día
- ☐ De 1 a casi 2 horas al día
- ☐ De 2 a casi 3 horas al día
- ☐ 3 o más horas al día

**22. Conduciendo o montando en un coche o autobús**

- ☐ Ninguno
  - ☐ Menos de ½ hora al día
  - ☐ De ½ a casi 1 hora al día
  - ☐ De 1 a casi 2 horas al día
  - ☐ De 2 a casi 3 horas al día
  - ☐ 3 o más horas al día
-

## **Por placer o para hacer ejercicio físico**

**Durante este trimestre, cuánto tiempo pasa normalmente:**

### **23. Caminando lentamente por placer o para hacer ejercicio físico**

- ☐ Ninguno
- ☐ Menos de ½ hora al día
- ☐ De ½ a casi 1 hora al día
- ☐ De 1 a casi 2 horas al día
- ☐ De 2 a casi 3 horas al día
- ☐ 3 o más horas al día

### **24. Caminando deprisa por placer o para hacer ejercicio físico**

- ☐ Ninguno
- ☐ Menos de ½ hora al día
- ☐ De ½ a casi 1 hora al día
- ☐ De 1 a casi 2 horas al día
- ☐ De 2 a casi 3 horas al día
- ☐ 3 o más horas al día

### **25. Caminando deprisa cuesta arriba por placer o para hacer ejercicio físico**

- ☐ Ninguno
- ☐ Menos de ½ hora al día
- ☐ De ½ a casi 1 hora al día
- ☐ De 1 a casi 2 horas al día
- ☐ De 2 a casi 3 horas al día
- ☐ 3 o más horas al día

**Durante este trimestre, cuánto tiempo pasa normalmente:**

### **26. Trotando**

- ☐ Ninguno
- ☐ Menos de ½ hora al día
- ☐ De ½ a casi 1 hora al día
- ☐ De 1 a casi 2 horas al día
- ☐ De 2 a casi 3 horas al día
- ☐ 3 o más horas al día

## **27. En clase de ejercicio prenatal**

- ☐ Ninguno
- ☐ Menos de ½ hora al día
- ☐ De ½ a casi 1 hora al día
- ☐ De 1 a casi 2 horas al día
- ☐ De 2 a casi 3 horas al día
- ☐ 3 o más horas al día

## **28. Nadando**

- ☐ Ninguno
- ☐ Menos de ½ hora al día
- ☐ De ½ a casi 1 hora al día
- ☐ De 1 a casi 2 horas al día
- ☐ De 2 a casi 3 horas al día
- ☐ 3 o más horas al día

## **29. Bailando**

- ☐ Ninguno
- ☐ Menos de ½ hora al día
- ☐ De ½ a casi 1 hora al día
- ☐ De 1 a casi 2 horas al día
- ☐ De 2 a casi 3 horas al día
- ☐ 3 o más horas al día

**¿Haciendo otras cosas por placer o para hacer ejercicio físico? Por favor indíquenos cuáles.**

30. \_\_\_\_\_ Nombre de la Actividad

- ☐ Ninguno
- ☐ Menos de ½ hora al día
- ☐ De ½ a casi 1 hora al día
- ☐ De 1 a casi 2 horas al día
- ☐ De 2 a casi 3 horas al día
- ☐ 3 o más horas al día

31. \_\_\_\_\_ Nombre de la Actividad

- ☐ Ninguno
  - ☐ Menos de ½ hora al día
  - ☐ De ½ a casi 1 hora al día
  - ☐ De 1 a casi 2 horas al día
  - ☐ De 2 a casi 3 horas al día
  - ☐ 3 o más horas al día
-

Por favor rellene el siguiente apartado si trabaja de forma remunerada, como voluntaria o como estudiante. Si es ama de casa, está desempleada o no puede trabajar, **no tiene que completar este apartado.**

### **En el trabajo...**

**Durante este trimestre, cuánto tiempo pasa normalmente:**

#### **32. Sentada en el trabajo o en clase**

- ☐ Ninguno
- ☐ Menos de ½ hora al día
- ☐ De ½ a casi 2 horas al día
- ☐ De 2 a casi 4 horas al día
- ☐ De 4 a casi 6 horas al día
- ☐ 6 o más horas al día

#### **33. De pie o caminando lentamente en el trabajo mientras carga con cosas (que pesen más que dos botellas de agua de litro y medio)**

- ☐ Ninguno
- ☐ Menos de ½ hora al día
- ☐ De ½ a casi 2 horas al día
- ☐ De 2 a casi 4 horas al día
- ☐ De 4 a casi 6 horas al día
- ☐ 6 o más horas al día

#### **34. De pie o caminando lentamente en el trabajo sin cargar nada**

- ☐ Ninguno
- ☐ Menos de ½ hora al día
- ☐ De ½ a casi 2 horas al día
- ☐ De 2 a casi 4 horas al día
- ☐ De 4 a casi 6 horas al día
- ☐ 6 o más horas al día

#### **35. Caminado deprisa en el trabajo mientras carga con pesos (que pesen más que dos botellas de agua de litro y medio)**

- ☐ Ninguno
- ☐ Menos de ½ hora al día
- ☐ De ½ a casi 2 horas al día
- ☐ De 2 a casi 4 horas al día
- ☐ De 4 a casi 6 horas al día
- ☐ 6 o más horas al día

**36. Caminando deprisa en el trabajo sin cargar nada**

- Ninguno
- Menos de ½ hora al día
- De ½ a casi 2 horas al día
- De 2 a casi 4 horas al día
- De 4 a casi 6 horas al día
- 6 o más horas al día

**Gracias**
